# Supplementary material
Source: PubMed Central journal article supplement (PMC5810139)

## Supplementary Data

### Figure legend

**Figure S1. Contribution of TRPC3, Orai2 and Orai3 to SOCE, detection of HA-TRPC1 via Western blotting and presence of mRNA transcripts for different TRPC and Orai channels.**

*A*, Western blot showing the detection of HA-TRPC1 and endogenous TRPC1 by using the anti-TRPC1 and anti-HA antibodies. *B*, Transcripts for different TRPCs and OraIs in HSG and HEK293 cells, as detected using RT-PCR. *C and D*, In HSG cells, knocking down TRPC3 (using shTRPC3), Orai2 (siOrai2) and Orai3 (siOrai3) did not significantly affect Tg-induced SOCE. *E*, In HEK293 cells, knocking down all three Orai proteins (siOrai1+siOrai2+siOrai3) did not yield further reductions in Tg-induced SOCE when compared to knocking down Orai1 alone (siOrai1).

Supplementary Figure 1.

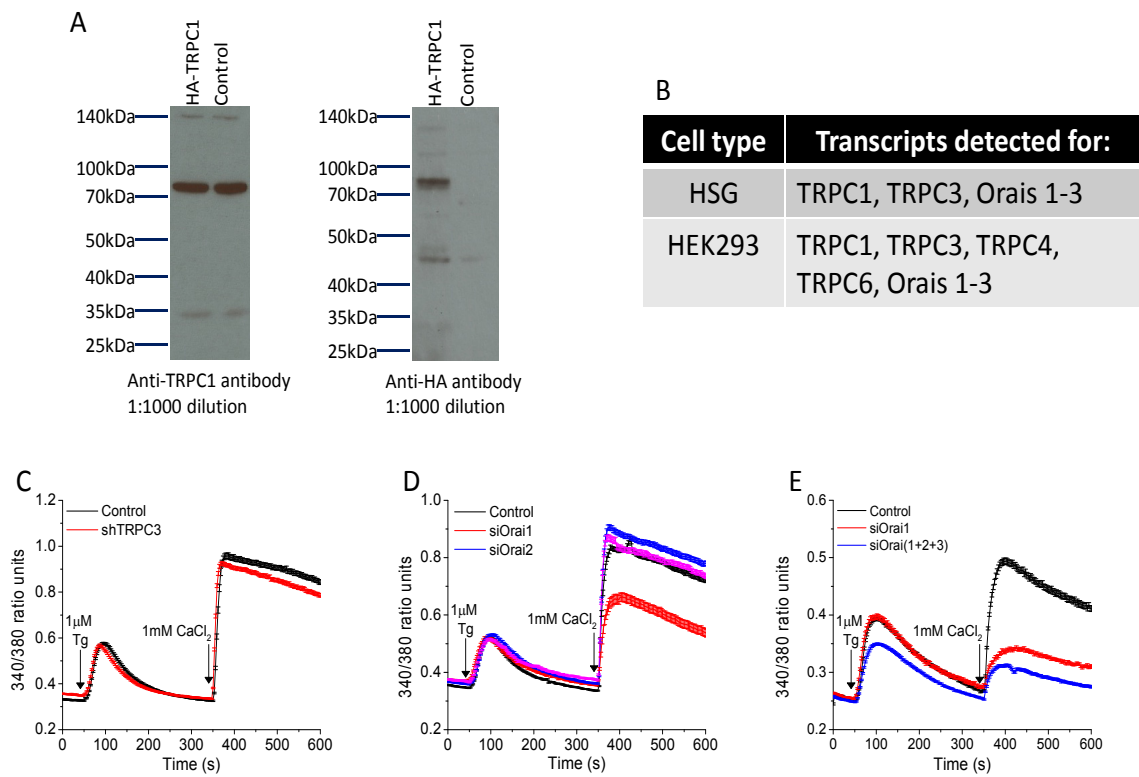

Supplement: NIHMS926711-supplement-supl.pdf [file NIHMS926711-supplement-supl.pdf]
